# Supplementary material for: A Fast Method of High-Frequency Induction Cladding Copper Alloy on Inner-Wall of Cylinder Based on Simulation and Experimental Study
Source: MDPI journal article supplement (doi:10.3390/coatings14040458), 2024-04-10
Supplement: s1 [file s1]

# Supporting Information

## A Fast Method of High-Frequency Induction Cladding Copper Alloy on Inner-Wall of Cylinder Based on Simulation and Experimental Study

Longlong He \*, Yafei Wang, Ruiyu Pan, Tianze Xu, Jiani Gao, Zhouzhou Zhang, Jinghui  
Chu, Yue Wu \*  
and Xuhui Zhang

Shaanxi Key Laboratory of Mine Electromechanical Equipment Intelligent  
Detection and Control, Xi'an University of Science and Technology, Xi'an  
710049, China; wyf20160423@163.com (Y.W.); pry17835972904@163.com (R.P.);  
x13835872797@163.com (T.X.); gjn20190326@163.com (J.G.); helonger@gmail.com  
(Z.Z.); chujh@xust.edu.cn (J.C.); zhangxh@xust.edu.cn (X.Z.)

\* Correspondence: hell@xust.edu.cn (L.H.); wuyue1992@xust.edu.cn (Y.W.)

Table S1 Experimental equipment parameters

| Device                                                                                                                                 | Name                              | Parameter         |
|----------------------------------------------------------------------------------------------------------------------------------------|-----------------------------------|-------------------|
| High frequency induction melting equipment<br><br>    | Model                             | RDGP-150B         |
|                                                                                                                                        | Input power                       | 150kW             |
|                                                                                                                                        | Maximum Oscillation power         | 150kW             |
|                                                                                                                                        | Oscillation range                 | 50-200kHz         |
|                                                                                                                                        | Input voltage                     | Three-phase 380v  |
|                                                                                                                                        | Cooling water pressure            | 0.2MPa            |
|                                                                                                                                        | Cooling water flow                | >10L/min          |
| Industrial cooling water circulation system<br><br> | Model                             | ST-3AC            |
|                                                                                                                                        | compressor power                  | 2.43kW            |
|                                                                                                                                        | Power                             | 0.55kW<br>0.75HP  |
|                                                                                                                                        | Refrigerant                       | R22               |
|                                                                                                                                        | Supply Voltage                    | 380V/3<br>Ph/50Hz |
|                                                                                                                                        | Cooling method                    | Air-cooled        |
|                                                                                                                                        | Refrigeration capacity            | 8.36kW            |
| Temperature detection equipment<br><br>             | Model                             | ST-3AC            |
|                                                                                                                                        | Model                             | DTM-T1            |
|                                                                                                                                        | Measuring range                   | -50~1350℃         |
|                                                                                                                                        | Measure the object distance ratio | 20:1              |
|                                                                                                                                        | Accuracy                          | ±5℃               |
|                                                                                                                                        | Emissivity                        | 0.1~1.0           |
|                                                                                                                                        | Ambient Temperature               | 0℃~40℃            |

|                                                                                                                                          |                                     |                          |
|------------------------------------------------------------------------------------------------------------------------------------------|-------------------------------------|--------------------------|
| <p>Workpiece rotation and translation device</p> 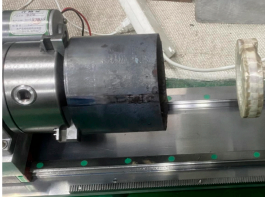       | Clamping and positioning            | small three-jaw chuck    |
|                                                                                                                                          | Feed rate                           | 2.0mm/s~2.5mm/s          |
|                                                                                                                                          | Cylinder rotation speed             | 40rad/s                  |
| <p>Induction heating coil with magnetic conductor</p>  | Outer diameter of the magnetic core | 116mm                    |
|                                                                                                                                          | Inner diameter of the magnetic core | 66mm                     |
|                                                                                                                                          | Thickness of the magnetic core      | 25mm                     |
|                                                                                                                                          | Application scope                   | 20kHz~2000kHz            |
|                                                                                                                                          | Magnetic flux density               | 3700~4000MT              |
|                                                                                                                                          | Magnetic material density           | 4.8~5.2g/cm <sup>3</sup> |

Table S2 Chemical composition of copper alloy cladding and cylindrical steel substrate

| Cladding          | Element | Content /% | Matrix        | Element | Content /% |
|-------------------|---------|------------|---------------|---------|------------|
| Copper-base alloy | Sn      | 18.050     | Cylinder body | C       | 0.24-0.32  |
|                   | Ni      | 18.260     |               | Si      | 1.10-1.40  |
|                   | Mn      | 0.823      |               | Mn      | 1.10-1.40  |
|                   | Al      | ≤0.002     |               | P       | ≤0.035     |
|                   | Fe      | 1.726      |               | S       | ≤0.035     |
|                   | Si      | ≤0.001     |               | Cu      | ≤0.300     |
|                   | Sb      | ≤0.001     |               | Cr      | ≤0.300     |
|                   | Bi      | ≤0.001     |               | Mo      | ≤0.150     |
|                   | Cu      | Margin     |               | Fe      | Margin     |

Table S3 The microhardness value of the bonding interface

| Microhardness/HV       |         | -0.5   | -0.4   | -0.3   | -0.2   | -0.1   | 0      | 0.1    | 0.2    | 0.3    |
|------------------------|---------|--------|--------|--------|--------|--------|--------|--------|--------|--------|
| Interface distance /mm | Sample1 | 354.26 | 365.33 | 360.02 | 395.62 | 405.01 | 565.82 | 720.03 | 744.03 | 745.75 |
|                        | Sample2 | 360.25 | 350.13 | 348.27 | 405.32 | 412.60 | 570.23 | 725.36 | 700.15 | 745.24 |
|                        | Sample3 | 340.25 | 323.32 | 360.25 | 375.20 | 413.26 | 600.35 | 730.26 | 705.26 | 710.20 |
| Microhardness/HV       |         | 0.4    | 0.5    | 0.6    | 0.7    | 0.8    | 0.9    | 1.0    | 1.1    | 1.2    |
| Interface distance /mm | Sample1 | 743.63 | 746.65 | 630.25 | 450.65 | 226.35 | 238.45 | 228.67 | 232.54 | 230.25 |
|                        | Sample2 | 745.87 | 650.25 | 745.45 | 755.26 | 745.46 | 460.25 | 223.46 | 228.98 | 232.30 |
|                        | Sample3 | 740.30 | 700.35 | 750.30 | 755.20 | 745.25 | 480.36 | 230.25 | 226.35 | 235.25 |

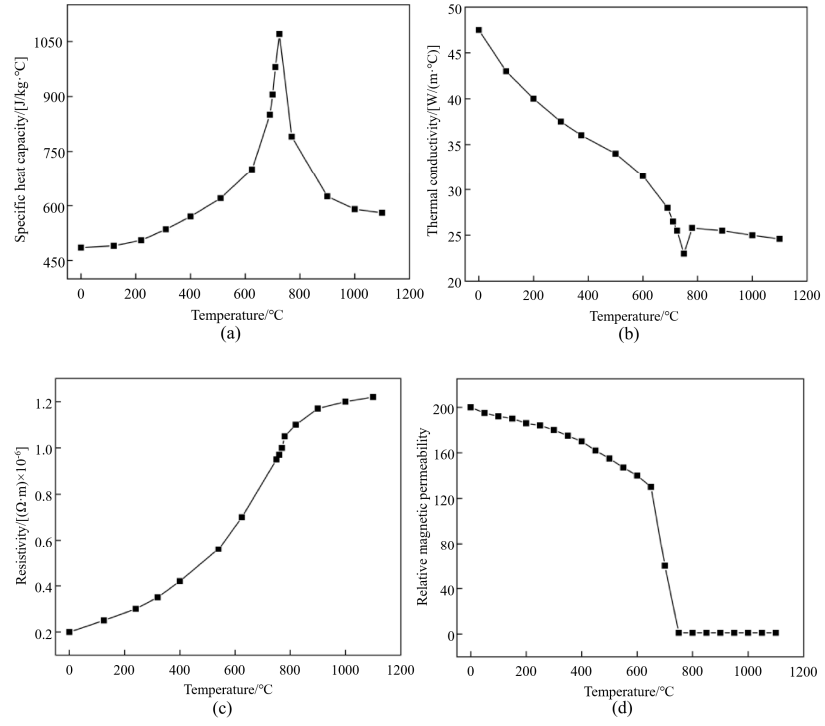

Figure S1. The physical parameters of the 27SiMn steel matrix change with temperature trends

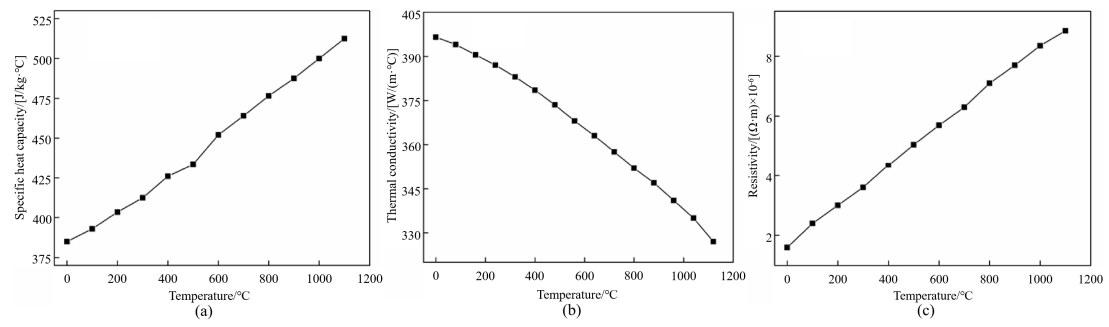

Figure S2. The physical parameters of copper alloys change with temperature trends

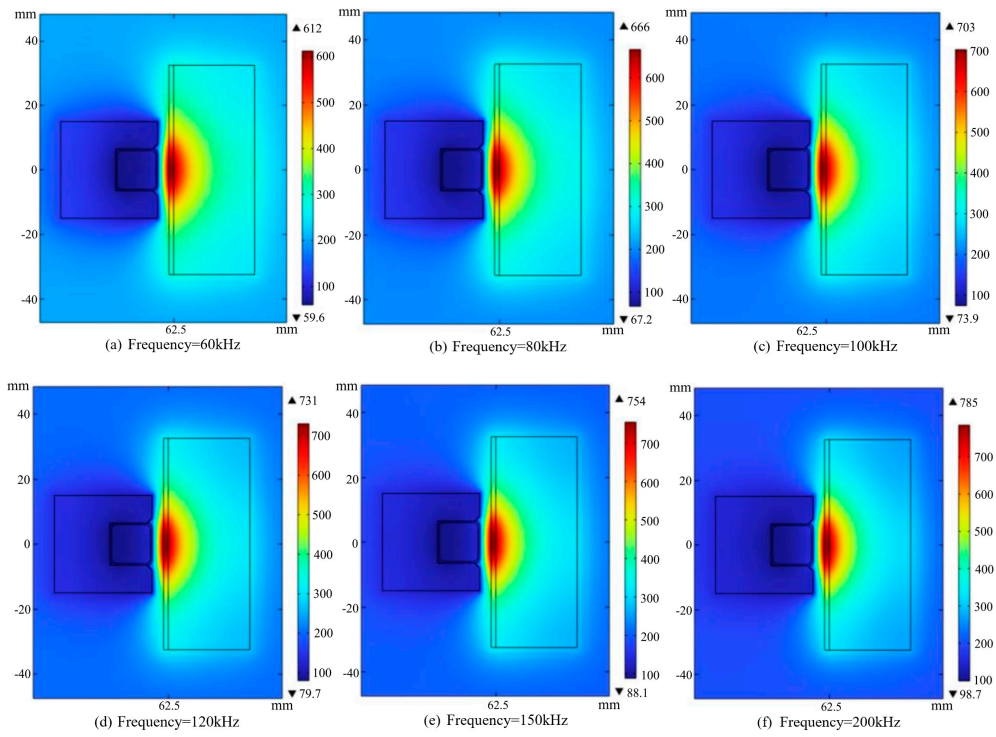

Figure S3. Temperature distribution at different frequencies at 3s



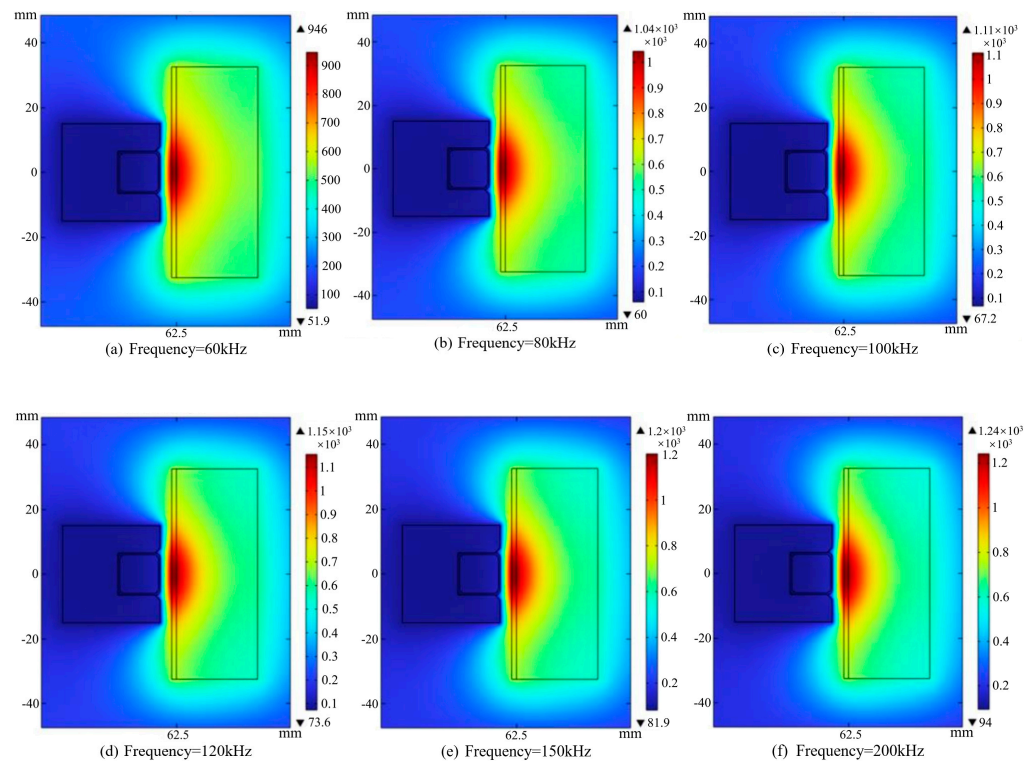

Figure S4. Temperature distribution at different frequencies at 9.5s

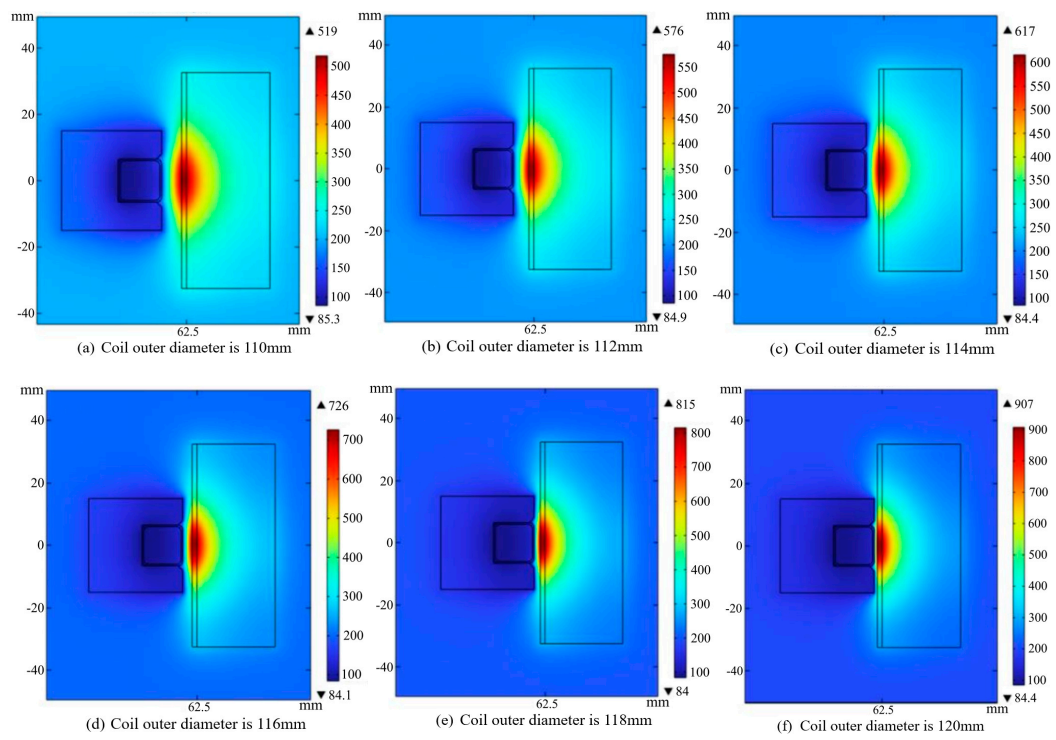

Figure S5. Temperature distribution under different outer diameters of induction coils at 2s

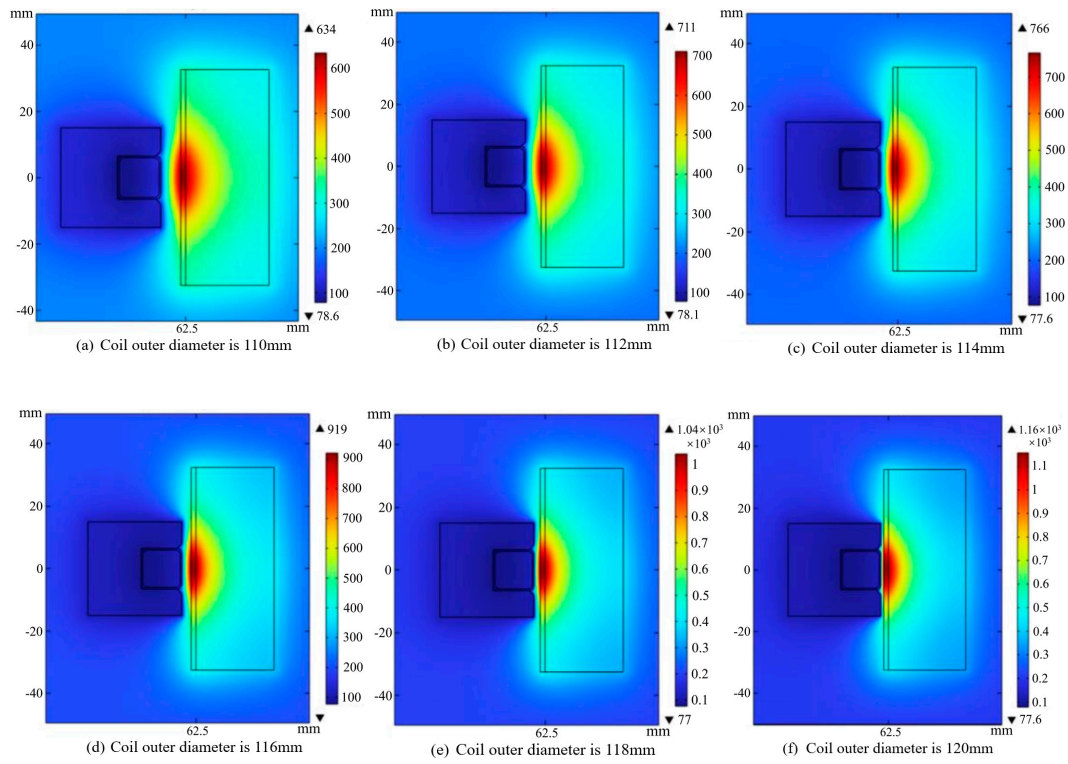

Figure S6. Temperature distribution under different outer diameters of induction coils at 4s

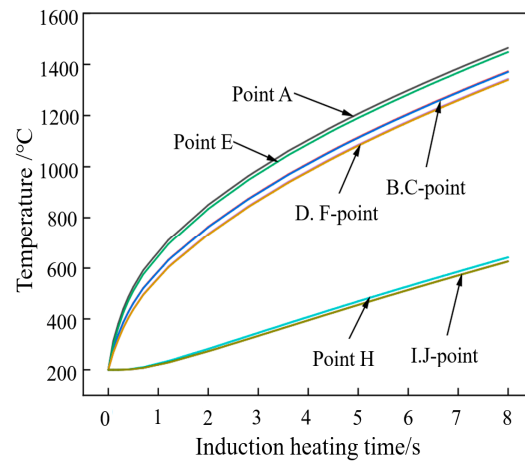

Figure S7. Simulate the thermal cycle curve of each point on a cylindrical workpiece

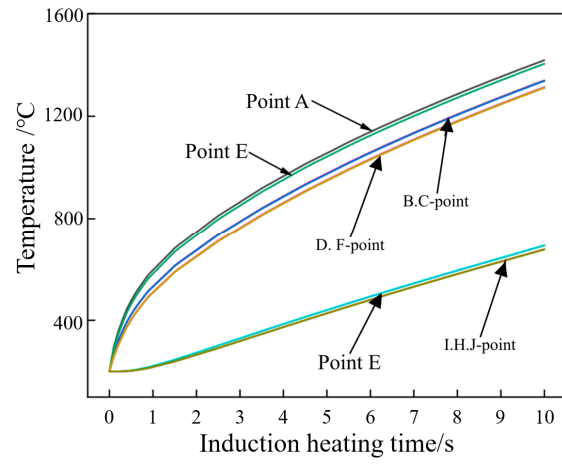

Figure S8. Simulate the thermal cycle curve of each point on the 2-cylindrical workpiece

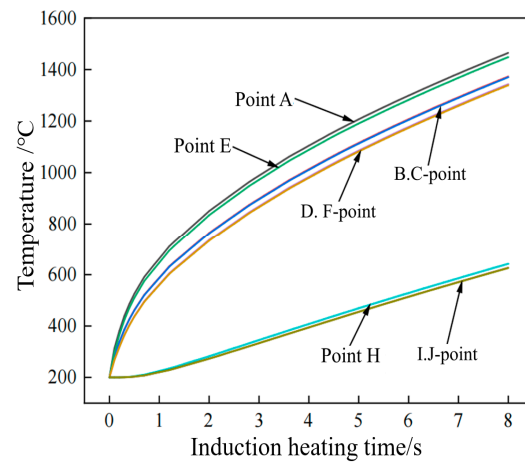

Figure S9. Simulate the thermal cycle curve of each point on the 3-cylindrical workpiece

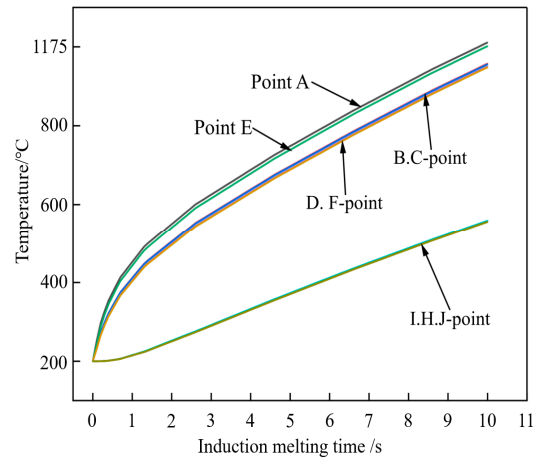

Figure S10. Simulate the thermal cycle curve of each point on the 4-cylindrical workpiece

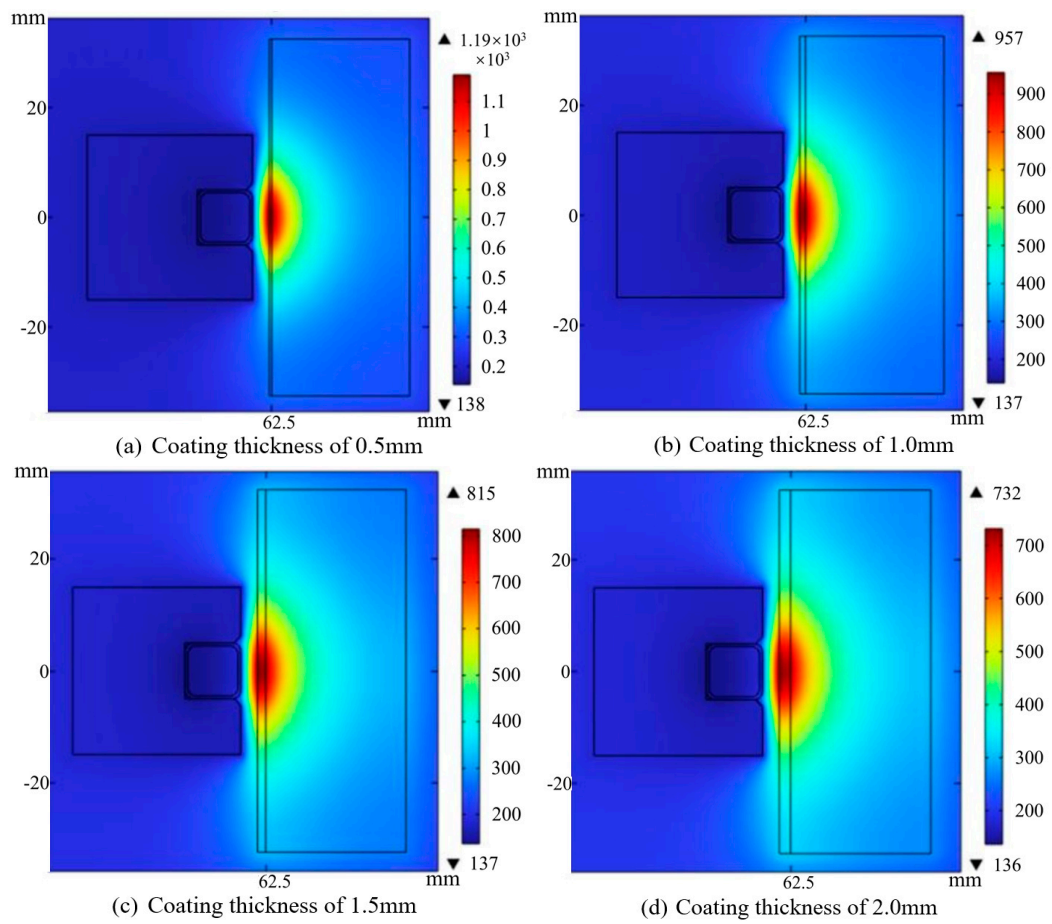

Figure S11. Temperature distribution of different cladding thicknesses at 3s



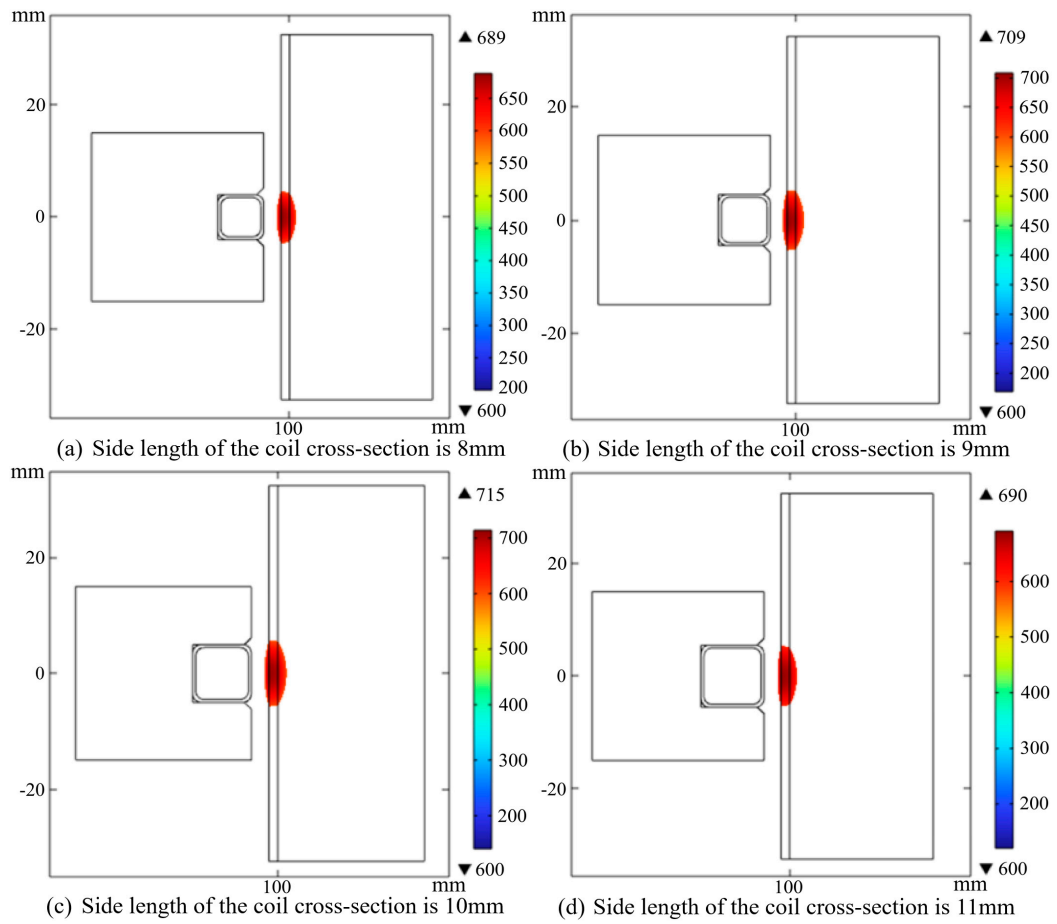

Figure S12. Temperature cloud map of the workpiece during 2s fusion of different cross-sectional edge lengths

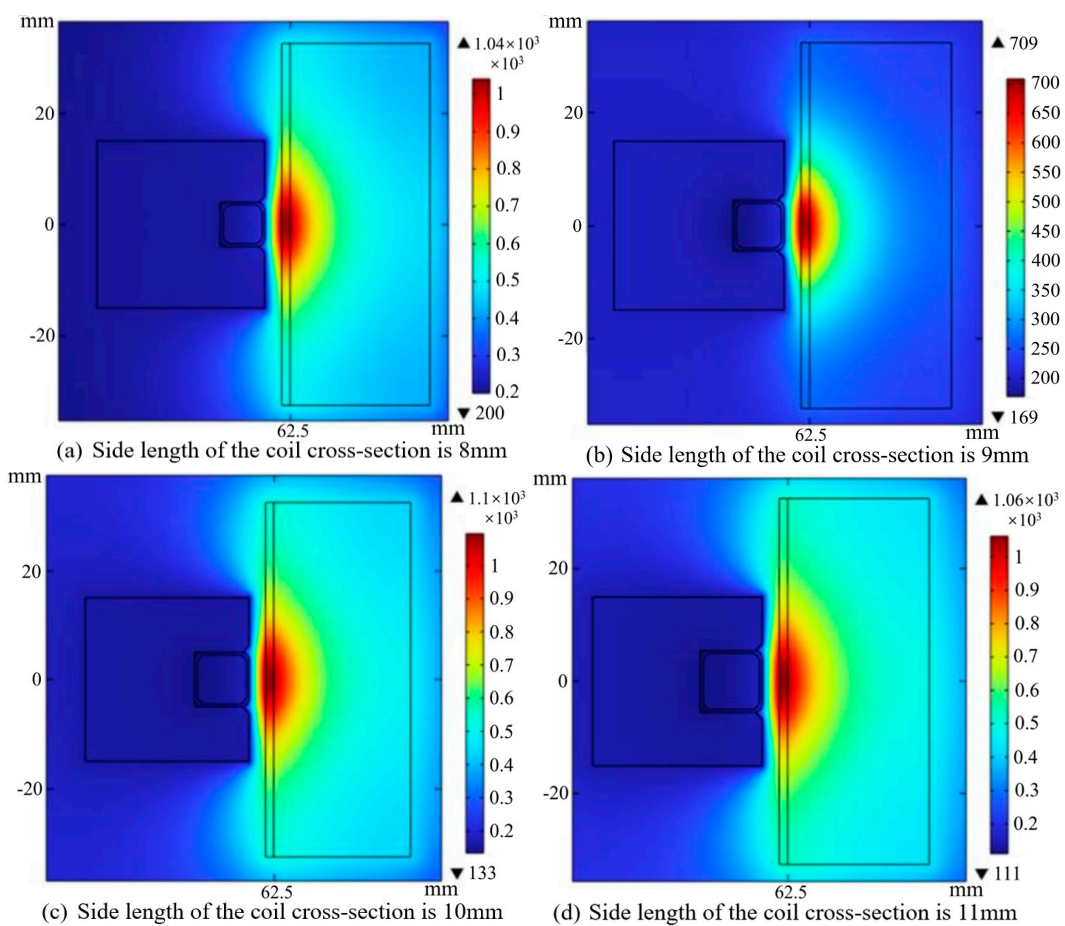

Figure S13. Temperature cloud map of the workpiece during induction melting for 6.5s

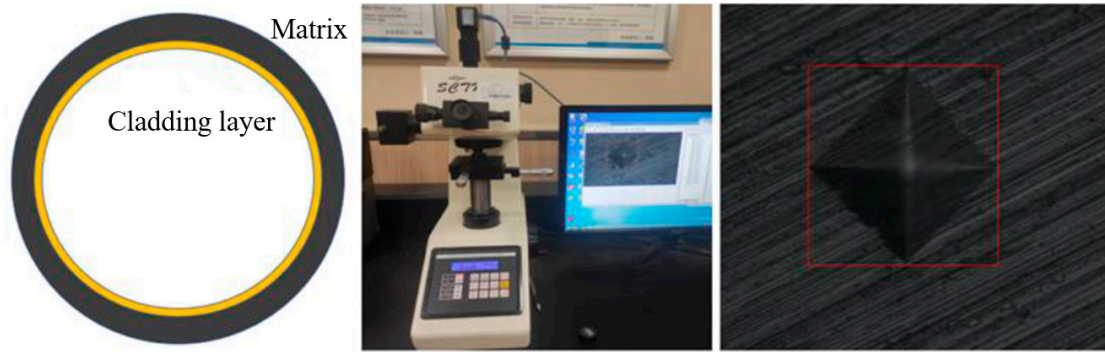

Figure S14. Schematic diagram of microhardness testing
